# Supplementary material for: Stress, dyadic coping, and relationship satisfaction: A longitudinal study disentangling timely stable from yearly fluctuations
Source: PubMed Central journal article supplement (PMC7145192; doi:10.1371/journal.pone.0231133), 2020-04-09
Supplement: pone.0231133.s007.pdf [file pone.0231133.s007.pdf]

**S6 Table. Random Effects Model Predicting Relationship Satisfaction with Stress and PSDC**

|                                                    | Female Partner |             |                 |                                    | Male Partner |             |                 |
|----------------------------------------------------|----------------|-------------|-----------------|------------------------------------|--------------|-------------|-----------------|
|                                                    | Estimate       | <i>S.E.</i> | <i>p</i>        |                                    | Estimate     | <i>S.E.</i> | <i>p</i>        |
| Level-1 (within-person) Main Effects ( $\beta$ )   |                |             |                 |                                    |              |             |                 |
| <b>Intercept</b>                                   | <b>4.03</b>    | <b>0.02</b> | <b>&lt; .01</b> | <b>Intercept</b>                   | <b>4.04</b>  | <b>0.02</b> | <b>&lt; .01</b> |
| <b>Stress (a)</b>                                  | <b>-0.10</b>   | <b>0.04</b> | <b>.01</b>      | <b>Stress (a)</b>                  | <b>-0.11</b> | <b>0.04</b> | <b>&lt; .01</b> |
| Stress (p)                                         | -0.03          | 0.04        | .48             | Stress (p)                         | 0.04         | 0.03        | .25             |
| <b>PSDC (a)</b>                                    | <b>0.22</b>    | <b>0.03</b> | <b>&lt; .01</b> | <b>PSDC (a)</b>                    | <b>0.16</b>  | <b>0.02</b> | <b>&lt; .01</b> |
| <b>PSDC (p)</b>                                    | <b>0.06</b>    | <b>0.02</b> | <b>&lt; .01</b> | <b>PSDC (p)</b>                    | <b>0.09</b>  | <b>0.02</b> | <b>&lt; .01</b> |
| Level-2 (between-person) Main Effects ( $\gamma$ ) |                |             |                 |                                    |              |             |                 |
| <b>Stress (a)</b>                                  | <b>-0.31</b>   | <b>0.07</b> | <b>&lt; .01</b> | Stress (a)                         | -0.07        | 0.06        | .25             |
| Stress (p)                                         | 0.02           | 0.07        | .79             | <b>Stress (p)</b>                  | <b>-0.24</b> | <b>0.06</b> | <b>&lt; .01</b> |
| <b>PSDC (a)</b>                                    | <b>0.38</b>    | <b>0.03</b> | <b>&lt; .01</b> | <b>PSDC (a)</b>                    | <b>0.02</b>  | <b>0.03</b> | <b>&lt; .01</b> |
| <b>PSDC (p)</b>                                    | <b>0.17</b>    | <b>0.04</b> | <b>&lt; .01</b> | <b>PSDC (p)</b>                    | <b>0.29</b>  | <b>0.03</b> | <b>&lt; .01</b> |
| Level-1 (within-person) Interactions               |                |             |                 |                                    |              |             |                 |
| Stress (a) x PSDC (a)                              | -0.11          | 0.10        | .28             | <b>Stress (a) x PSDC (a)</b>       | <b>0.31</b>  | <b>0.10</b> | <b>&lt; .01</b> |
| Level-2 (between-person) Interactions              |                |             |                 |                                    |              |             |                 |
| Stress (a) x PSDC (a)                              | 0.06           | 0.09        | .48             | Stress (a) x PSDC (a)              | 0.03         | 0.08        | .70             |
| Stress (p) x PSDC (a)                              | -0.05          | 0.10        | .62             | Stress (p) x PSDC (a)              | 0.16         | 0.08        | .06             |
| Stress (a) x PSDC (p)                              | 0.10           | 0.09        | .25             | Stress (a) x PSDC (p)              | -0.02        | 0.09        | .80             |
| Stress (p) x PSDC (p)                              | -0.04          | 0.09        | .67             | Stress (p) x PSDC (p)              | -0.03        | 0.08        | .73             |
| Cross-Level-Interactions                           |                |             |                 |                                    |              |             |                 |
| Stress L1 (a) x PSDC L2 (a)                        | 0.01           | 0.05        | .92             | <b>Stress L1 (a) x PSDC L2 (a)</b> | <b>0.14</b>  | <b>0.06</b> | <b>.02</b>      |
| <b>PSDC L1 (a) x PSDC L2(a)</b>                    | <b>-0.13</b>   | <b>0.04</b> | <b>&lt; .01</b> | <b>PSDC L1 (a) x PSDC L2(a)</b>    | <b>-0.09</b> | <b>0.04</b> | <b>.01</b>      |
| <b>PSDC L1 (a) x Stress L2 (a)</b>                 | <b>0.19</b>    | <b>0.07</b> | <b>.01</b>      | <b>PSDC L1 (a) x Stress L2 (a)</b> | <b>0.15</b>  | <b>0.07</b> | <b>.04</b>      |
| PSDC L1 (a) x Stress L2 (p)                        | 0.06           | 0.08        | .46             | PSDC L1 (a) x Stress L2 (p)        | 0.10         | 0.06        | .12             |

*Notes.* Estimate: estimated effect. *S.E.*: standard error. a: actor effect, p: partner effect. L1: level-1; L2: level-2.

PSDC: Perceived Supportive Dyadic Coping provided by the partner. Significant parameters are presented in bold type.
